# Supplementary material for: Pressure-stabilized polymerization of nitrogen in manganese nitrides at ambient and high pressures
Source: Royal Society of Chemistry journal article supplement (doi:10.1039/d1cp03068j), 2022-01-01
Supplement: d1cp03068j1.pdf [file d1cp03068j1.pdf]

## Supporting Information

### **Pressure-stabilized polymerization of nitrogen in manganese nitrides at ambient and high pressures**

Shifeng Niu<sup>1</sup>, Dan Xu<sup>1</sup>, Haiyan Li<sup>1</sup>, Zhen Yao<sup>1\*</sup>, Shuang Liu<sup>1</sup>, Chunguang Zhai<sup>1</sup>, Kuo  
Hu<sup>1</sup>, Xuhan Shi<sup>2</sup>, Peng Wang<sup>1\*</sup> and Bingbing Liu<sup>1\*</sup>

<sup>1</sup>State Key Laboratory of Superhard Materials, College of Physics, Jilin University,  
Changchun, 130012, P. R. China

<sup>2</sup>Aviation University of Air Force, Changchun, 130022, P.R. China

---

\*Corresponding Authors  
E-mail: yaozhen@jlu.edu.cn  
E-mail: wangpengtrrs@jlu.edu.cn  
E-mail: liubb@jlu.edu.cn

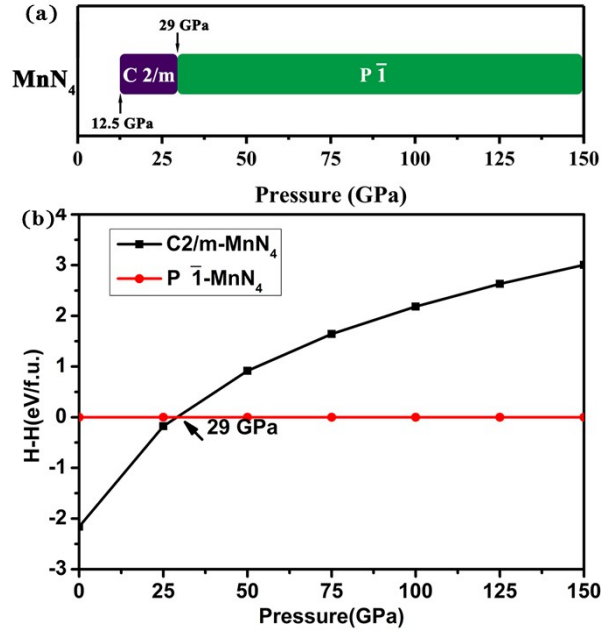

**Fig. S1.** (a) The stable pressure range of  $C2/m$ - $\text{MnN}_4$  and  $P\bar{1}$ - $\text{MnN}_4$ , and (b) enthalpy of the  $C2/m$ - $\text{MnN}_4$  phase relative to the  $P\bar{1}$ - $\text{MnN}_4$  phase with pressure.

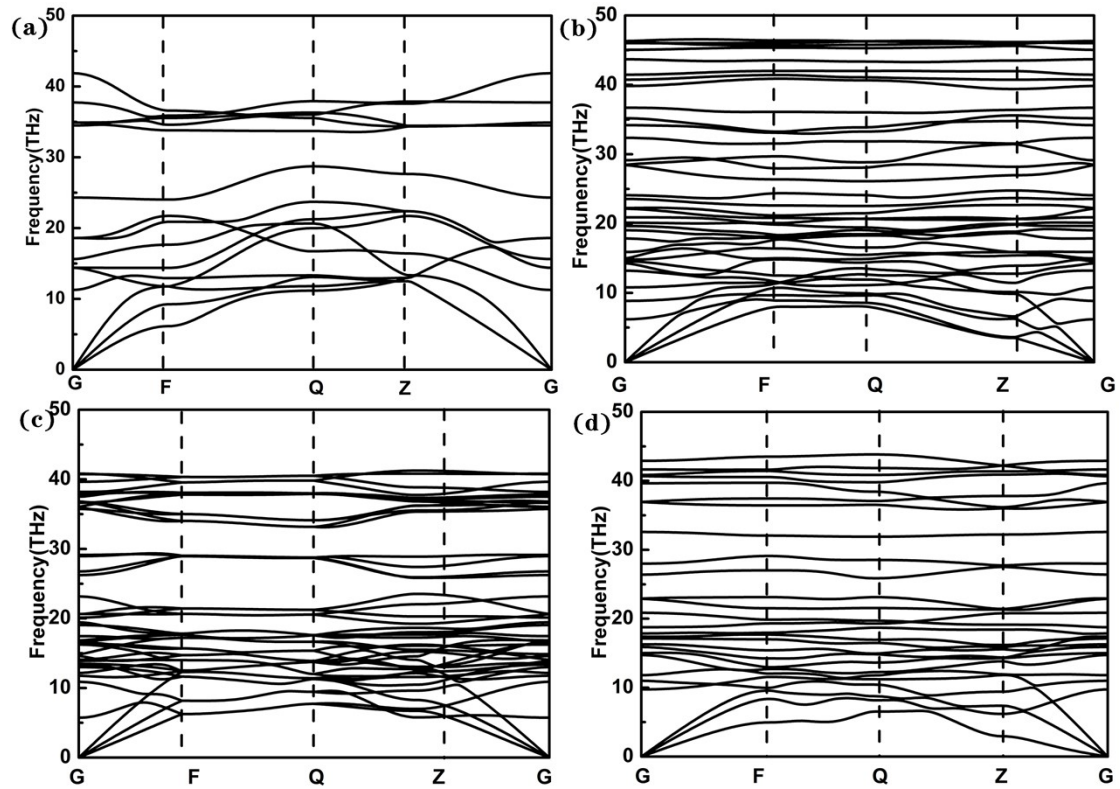

**Fig. S2.** The phonon dispersion curves of (a)  $P4/mmm$ - $\text{MnN}_4$  at 100 GPa, (b)  $P\bar{1}$ - $\text{MnN}_5$  at 150 GPa, (c)  $C2/m$ - $\text{MnN}_6$  at 50 GPa, and (d)  $P\bar{1}$ - $\text{MnN}_8$  at 50 GPa.

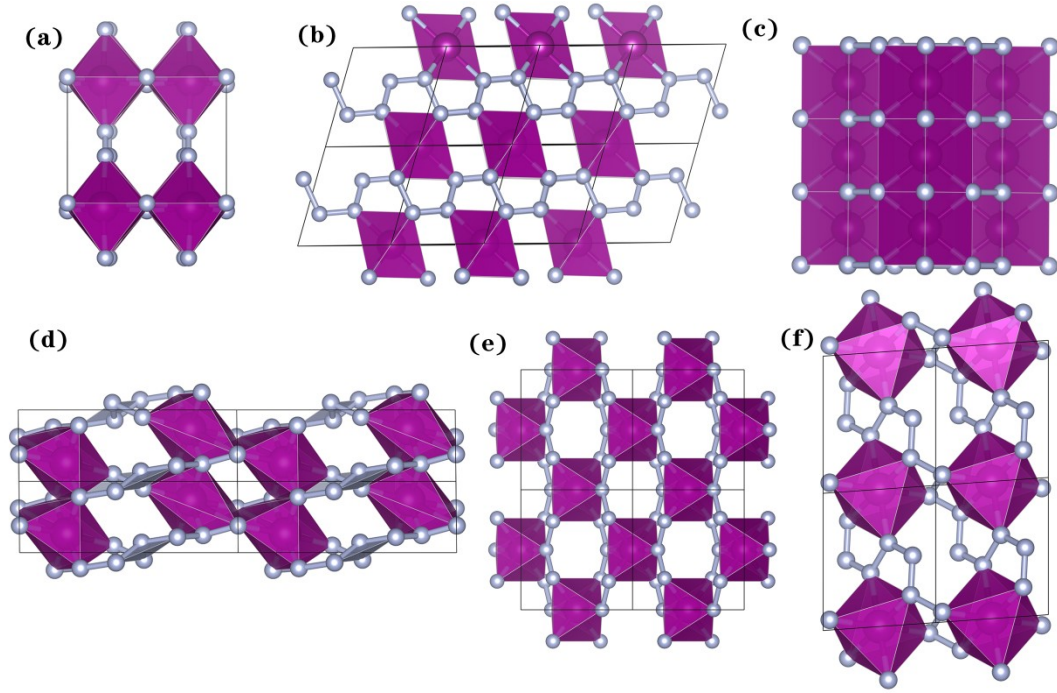

**Fig. S3.** The polyhedral supercell structures of the predicted phases: (a)  $C2/m$ - $MnN_4$ , (b)  $P \bar{1}$ - $MnN_4$ , (c)  $P4/mmm$ - $MnN_4$ , (d)  $P \bar{1}$ - $MnN_5$ , (e)  $C2/m$ - $MnN_6$ , and (f)  $P \bar{1}$ - $MnN_8$ .

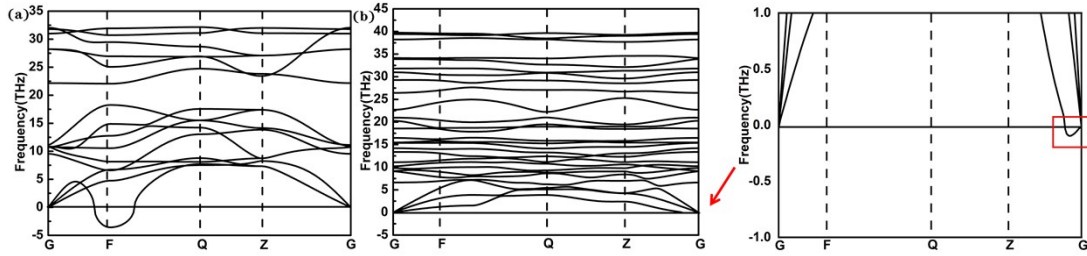

**Fig. S4.** The phonon dispersion curves of (a)  $P4/mmm$ - $MnN_4$  at 0 GPa and (b)  $P \bar{1}$ - $MnN_8$  at 0 GPa.

**Table S1.** Structural parameters of the Mn-N compounds at corresponding pressure.

| Structure            | Pressure (GPa) | Lattice parameters ( $\text{\AA}$ , $^\circ$ )                                                                             | Atomic Positions                                                          |
|----------------------|----------------|----------------------------------------------------------------------------------------------------------------------------|---------------------------------------------------------------------------|
| $P6_3/mmc$ - $Mn_2N$ | 50             | $a = 2.5102$<br>$b = 2.5102$<br>$c = 8.6143$<br>$\alpha = 90.00^\circ$<br>$\beta = 90.00^\circ$<br>$\gamma = 120.00^\circ$ | $Mn_1(4f)$ (0.6667, 0.3333, 0.6074)<br>$N_1(2d)$ (0.6667, 0.3333, 0.2500) |

|                               |     |                                                                                                                             |                                                                                                                                                                                                                                                                                               |
|-------------------------------|-----|-----------------------------------------------------------------------------------------------------------------------------|-----------------------------------------------------------------------------------------------------------------------------------------------------------------------------------------------------------------------------------------------------------------------------------------------|
| C2/m-MnN <sub>4</sub>         | 20  | $a = 7.6064$<br>$b = 5.5432$<br>$c = 10.3809$<br>$\alpha = 90.00^\circ$<br>$\beta = 154.99^\circ$<br>$\gamma = 90.00^\circ$ | Mn <sub>1</sub> (4g) (0.0000, 0.2238, 0.0000)<br>N <sub>1</sub> (8j) (-1.5704, 0.2380, -1.5968)<br>N <sub>2</sub> (4i) (-2.2758, 0.5000, -1.9694)<br>N <sub>3</sub> (4i) (0.3055, 0.0000, -0.0290)                                                                                            |
| P $\bar{1}$ -MnN <sub>4</sub> | 50  | $a = 3.7071$<br>$b = 3.8140$<br>$c = 5.1901$<br>$\alpha = 98.21^\circ$<br>$\beta = 110.51^\circ$<br>$\gamma = 73.47^\circ$  | Mn <sub>1</sub> (2i) (0.7632, 0.0026, 0.7613)<br>N <sub>1</sub> (2i) (0.1861, 0.6554, 0.6873)<br>N <sub>2</sub> (2i) (0.6775, 0.6498, 0.1855)<br>N <sub>3</sub> (2i) (0.0992, 0.3231, 0.9615)<br>N <sub>4</sub> (2i) (0.5984, 0.3191, 0.4640)                                                 |
| P4/mmm-MnN <sub>4</sub>       | 100 | $a = 3.5131$<br>$b = 3.5131$<br>$c = 2.3547$<br>$\alpha = 90.00^\circ$<br>$\beta = 90.00^\circ$<br>$\gamma = 90.00^\circ$   | Mn <sub>1</sub> (1c) (0.5000, 0.5000, 0.0000)<br>N <sub>1</sub> (4k) (0.8050, 0.1940, 0.5000)                                                                                                                                                                                                 |
| P $\bar{1}$ -MnN <sub>5</sub> | 150 | $a = 2.3722$<br>$b = 3.7598$<br>$c = 7.2847$<br>$\alpha = 88.00^\circ$<br>$\beta = 90.62^\circ$<br>$\gamma = 91.50^\circ$   | Mn <sub>1</sub> (2i) (0.2644, 0.6189, 0.2150)<br>N <sub>1</sub> (2i) (0.2188, 0.0321, 0.7226)<br>N <sub>2</sub> (2i) (0.8591, 0.1085, 0.4408)<br>N <sub>3</sub> (2i) (0.3789, 0.8451, 0.0020)<br>N <sub>4</sub> (2i) (0.7555, 0.2581, 0.1595)<br>N <sub>5</sub> (2i) (0.0997, 0.4199, 0.4312) |
| C2/m-MnN <sub>6</sub>         | 50  | $a = 5.1820$<br>$b = 4.8642$<br>$c = 4.3284$<br>$\alpha = 90.00^\circ$<br>$\beta = 61.10^\circ$<br>$\gamma = 90.00^\circ$   | Mn <sub>1</sub> (2d) (0.0000, 0.5000, 0.5000)<br>N <sub>1</sub> (8j) (0.7870, 0.2375, 0.8349)<br>N <sub>2</sub> (4i) (0.7265, 0.0000, 0.7307)                                                                                                                                                 |

|                               |    |             |                                               |
|-------------------------------|----|-------------|-----------------------------------------------|
| P $\bar{1}$ -MnN <sub>8</sub> | 50 | a = 3.7604  | Mn <sub>1</sub> (1e) (0.5000, 0.5000, 0.0000) |
|                               |    | b = 3.7855  | N <sub>1</sub> (2i) (0.4204, 0.5923, 0.6062)  |
|                               |    | c = 4.4830  | N <sub>2</sub> (2i) (0.7774, 0.2247, 0.7866)  |
|                               |    | α = 97.15°  | N <sub>3</sub> (2i) (0.9421, 0.8681, 0.0742)  |
|                               |    | β = 92.31°  | N <sub>4</sub> (2i) (0.2046, 0.7742, 0.4997)  |
|                               |    | γ = 102.71° |                                               |

**Table S2.** The elastic constants  $C_{ij}$  (GPa) of the Mn-N compounds at 0 GPa.

| MnN <sub>x</sub>              | C <sub>11</sub> | C <sub>22</sub> | C <sub>33</sub> | C <sub>44</sub> | C <sub>55</sub> | C <sub>66</sub> | C <sub>12</sub> | C <sub>13</sub> | C <sub>15</sub> | C <sub>23</sub> | C <sub>25</sub> | C <sub>35</sub> | C <sub>46</sub> |
|-------------------------------|-----------------|-----------------|-----------------|-----------------|-----------------|-----------------|-----------------|-----------------|-----------------|-----------------|-----------------|-----------------|-----------------|
| C2/m-MnN <sub>4</sub>         | 404             | 214             | 320             | 103             | 15              | 26              | 8               | 4               | 10              | 82              | -4              | -4              | 0.02            |
| P $\bar{1}$ -MnN <sub>4</sub> | 439             | 629             | 295             | 172             | 185             | 214             | 80              | 120             | -137            | 68              | -35             | -88             | -74             |
| P4/mmm-MnN <sub>4</sub>       | 720             | 720             | 396             | 109             | 109             | 205             | 100             | 4               | -               | -               | -               | -               | -               |
| P $\bar{1}$ -MnN <sub>5</sub> | 408             | 292             | 584             | 122             | 238             | 164             | 117             | 141             | -36             | 70              | -33             | -102            | -28             |
| C2/m-MnN <sub>6</sub>         | 211             | 520             | 441             | 176             | 136             | 134             | 101             | 87              | -8              | 107             | 25              | -6              | -20             |
| P $\bar{1}$ -MnN <sub>8</sub> | 108             | 423             | 280             | 105             | 55              | 60              | 37              | 49              | 18              | 111             | -8              | -60             | -23             |

Monoclinic structure:

The mechanical stability criteria of monoclinic structure are shown as follows:

$$C_{11} > 0, C_{22} > 0, C_{33} > 0, C_{44} > 0, C_{55} > 0, C_{66} > 0, [C_{11} + C_{22} + C_{33} + 2(C_{12} + C_{13} + C_{23})] > 0$$

$$C_{33}C_{55} - C_{35}^2 > 0, C_{44}C_{66} - C_{46}^2 > 0, C_{22} + C_{33} - 2C_{23} > 0,$$

$$C_{22}(C_{33}C_{55} - C_{35}^2) + 2C_{23}C_{25}C_{35} - (C_{23}^2)C_{55} - (C_{25}^2)C_{33} > 0$$

$$2[C_{15}C_{25}(C_{33}C_{12} - C_{13}C_{23}) + C_{15}C_{35}(C_{22}C_{13} - C_{12}C_{23}) + C_{25}C_{35}(C_{11}C_{23} - C_{12}C_{13})] - [C_{15}^2(C_{22}C_{33} - C_{23}^2) + C_{25}C_{25}(C_{11}C_{33} - C_{13}^2) + C_{35}C_{35}(C_{11}C_{22} - C_{12}^2)] + C_{55}g > 0$$

At ambient pressure, the monoclinic C2/m-MnN<sub>4</sub> and C2/m-MnN<sub>6</sub> are mechanically unstable due to that their elastic tensors  $C_{ij}$  do not satisfy to the criteria.

Triclinic structure:

The mechanical stability criteria of triclinic structure are shown as follows:

$$C_{11} > 0, C_{22} > 0, C_{33} > 0, C_{44} > 0, C_{55} > 0, C_{66} > 0$$

$$[C_{11} + C_{22} + C_{33} + 2(C_{12} + C_{13} + C_{23})] > 0$$

$$(C_{33}C_{55} - C_{35}^2) > 0, (C_{44}C_{66} - C_{46}^2) > 0, (C_{22} + C_{33} - 2C_{23}) > 0$$

$$[C_{22} (C_{33}C_{55} - C_{35}^2) + 2C_{23}C_{25}C_{35} - C_{23}^2C_{55} - C_{23}^2C_{33}] > 0$$

At ambient pressure, the triclinic  $P \bar{1}$ -MnN<sub>4</sub>,  $P \bar{1}$ -MnN<sub>5</sub> and  $P \bar{1}$ -MnN<sub>8</sub> are mechanically stable due to that their elastic tensors C<sub>ij</sub> satisfy to the criteria.

Tetragonal structure:

The mechanical stability criteria of tetragonal structure are shown as follows:

$$C_{11} > |C_{12}|$$

$$2C_{13}^2 < C_{33} (C_{11} + C_{12})$$

$$C_{44} > 0$$

At ambient pressure, the tetragonal P4/mmm-MnN<sub>4</sub> is mechanically stable due to that its elastic tensor C<sub>ij</sub> satisfies to the criteria.

**Table S3.** The Bader charges transfer of the Mn-N compounds, the "N" is the number of each equivalent atom (Mn and N atoms) in one cell and the "sigma (e)" is the corresponding number of electrons lost and gained by the Mn and N atoms, respectively.

| Structure                                     | Atom            | N | Charge value(e) | σ(e)  |
|-----------------------------------------------|-----------------|---|-----------------|-------|
| <b>C2/m-MnN<sub>4</sub></b>                   | Mn <sub>1</sub> | 4 | 11.67           | -1.30 |
|                                               | N <sub>1</sub>  | 8 | 5.20            | 0.20  |
|                                               | N <sub>2</sub>  | 4 | 5.49            | 0.49  |
|                                               | N <sub>3</sub>  | 4 | 5.41            | 0.41  |
| <b>P <math>\bar{1}</math>-MnN<sub>4</sub></b> | Mn <sub>1</sub> | 2 | 11.81           | -1.19 |
|                                               | N <sub>1</sub>  | 2 | 5.20            | 0.20  |
|                                               | N <sub>2</sub>  | 2 | 5.22            | 0.22  |
|                                               | N <sub>3</sub>  | 2 | 5.37            | 0.37  |
|                                               | N <sub>4</sub>  | 2 | 5.39            | 0.39  |
| <b>P4/mmm-MnN<sub>4</sub></b>                 | Mn <sub>1</sub> | 1 | 11.76           | -1.24 |
|                                               | N <sub>1</sub>  | 4 | 5.31            | 0.31  |
| <b>P <math>\bar{1}</math>-MnN<sub>5</sub></b> | Mn <sub>1</sub> | 2 | 11.90           | -1.10 |
|                                               | N <sub>1</sub>  | 2 | 5.34            | 0.34  |

|                                               |                 |   |       |       |
|-----------------------------------------------|-----------------|---|-------|-------|
|                                               | N <sub>2</sub>  | 2 | 5.34  | 0.34  |
|                                               | N <sub>3</sub>  | 2 | 5.25  | 0.25  |
|                                               | N <sub>4</sub>  | 2 | 5.19  | 0.19  |
|                                               | N <sub>5</sub>  | 2 | 4.99  | -0.01 |
| <b>C2/m-MnN<sub>6</sub></b>                   | Mn <sub>1</sub> | 2 | 11.70 | -1.30 |
|                                               | N <sub>1</sub>  | 8 | 5.23  | 0.23  |
|                                               | N <sub>2</sub>  | 4 | 5.19  | 0.19  |
| <b>P <math>\bar{1}</math>-MnN<sub>8</sub></b> | Mn <sub>1</sub> | 1 | 11.72 | -1.28 |
|                                               | N <sub>1</sub>  | 2 | 5.22  | 0.22  |
|                                               | N <sub>2</sub>  | 2 | 5.04  | 0.04  |
|                                               | N <sub>3</sub>  | 2 | 5.16  | 0.16  |
|                                               | N <sub>4</sub>  | 2 | 5.18  | 0.18  |
